# Supplementary material for: All-analog photoelectronic chip for high-speed vision tasks
Source: PubMed Central journal article supplement (PMC10620079; doi:10.1038/s41586-023-06558-8), 2023-10-25
Supplement: 41586_2023_6558_MOESM1_ESM.pdf [file 41586_2023_6558_MOESM1_ESM.pdf]

## Supplementary information

---

# All-analog photoelectronic chip for high-speed vision tasks

---

In the format provided by the authors and unedited

# Supplementary Information for

## All-analog photo-electronic chip for high-speed vision tasks

Yitong Chen<sup>1\*</sup>, Maimaiti Nazhamaiti<sup>2\*</sup>, Han Xu<sup>2\*</sup>, Yao Meng<sup>3</sup>, Tiankuang Zhou<sup>1,3,4</sup>,  
Guangpu Li<sup>1,3</sup>, Jingtao Fan<sup>3</sup>, Qi Wei<sup>6</sup>, Jiamin Wu<sup>1,3†</sup>, Fei Qiao<sup>2†</sup>, Lu Fang<sup>2,3,5†</sup>,  
Qionghai Dai<sup>1,3,5†</sup>

<sup>1</sup>*Department of Automation, Tsinghua University, Beijing, 100084, China*

<sup>2</sup>*Department of Electronic Engineering, Tsinghua University, Beijing, 100084, China*

<sup>3</sup>*Institute for Brain and Cognitive Sciences, Tsinghua University, Beijing, 100084, China*

<sup>4</sup>*Shenzhen International Graduate School, Tsinghua University, Shenzhen, 518071, China*

<sup>5</sup>*Beijing National Research Center for Information Science and Technology, Tsinghua University, Beijing 100084, China*

<sup>6</sup>*Department of Precision Instruments, Tsinghua University, Beijing, 100084, China*

*\*These authors contributed equally to this work*

†Correspondence: qhdai@tsinghua.edu.cn (Q. D.), fanglu@tsinghua.edu.cn (L. F.),  
qiaofei@tsinghua.edu.cn (F. Q.), wujiamin@tsinghua.edu.cn (J. W.)

## Table of Contents

|                              |                                                                                                                                               |
|------------------------------|-----------------------------------------------------------------------------------------------------------------------------------------------|
| <b>Supplementary Note 1</b>  | The operation principle of ACCEL SRAM unit.                                                                                                   |
| <b>Supplementary Note 2</b>  | Modelling of capacitance compensation in ACCEL.                                                                                               |
| <b>Supplementary Note 3</b>  | Experimentally measured nonlinear response in ACCEL.                                                                                          |
| <b>Supplementary Note 4</b>  | Experimental computing speed and energy efficiency of ACCEL with 1-layer digital computation.                                                 |
| <b>Supplementary Note 5</b>  | Comparison between the comparator and ADC.                                                                                                    |
| <b>Supplementary Note 6</b>  | Weight-switching time of SRAM.                                                                                                                |
| <b>Supplementary Note 7</b>  | Design and simulation platform for EAC.                                                                                                       |
| <b>Supplementary Note 8</b>  | Calculations of the noise variance in ACCEL outputs.                                                                                          |
| <b>Supplementary Note 9</b>  | Experimental computing speed and energy efficiency of ACCEL.                                                                                  |
| <b>Supplementary Table 1</b> | Benchmark of digital neural networks to compare with ACCEL.                                                                                   |
| <b>Supplementary Table 2</b> | Comparisons between the adopted comparator and the state-of-the-art 10-bit high-speed ADC fabricated with 180-nm CMOS process.                |
| <b>Supplementary Table 3</b> | Experimentally measured latency for the output voltage of ACCEL to reach 20-dB signal-to-noise ratio (SNR) under different input light power. |
| <b>Supplementary Table 4</b> | Experimental computing performance of ACCEL in the all-analog mode.                                                                           |
| <b>Supplementary Table 5</b> | Experimental computing performance of ACCEL connected with one digital layer.                                                                 |
| <b>Supplementary Table 6</b> | Structures of digital neural networks with different layer numbers for comparison with ACCEL on 10-class MNIST classification.                |
| <b>Supplementary Table 7</b> | Structures of digital neural networks with different layer numbers for comparisons with ACCEL for 3-class ImageNet classification.            |

### Supplementary Note 1: The operation principle of ACCEL SRAM unit

The EAC weights of ACCEL are stored in the pixel-embedded SRAM macro shown in Extended Data Fig. 1a, and the detailed circuit structure of the SRAM unit is presented in Extended Data Fig. 1b. The SRAM write operation is performed by setting high write word-line ( $WWL$ ) to turn on N-channel metal-oxide semiconductor (NMOS) transistor switches  $N_1$  and  $N_2$  in the SRAM unit, and setting the write bit-line  $WBL$  and  $WBLB$  voltage according to the data to be written. For  $WBL$ , the voltage should be set to supply voltage  $V_{DD}$  if the weight value to be written is +1, and set to ground voltage if the weight value to be written is -1. The voltage of the  $WBLB$  to be set is opposite to  $WBL$ .

The SRAM readout operation is performed in two phases. For example in Extended Data Fig. 1a, to read out  $w_0$ , the column-read switch  $S_{C0}$  is first turned on by setting signal  $RCL[0]$  high to connect the read bit-line  $RBL[0]$  to line  $D_{OUT}$ . Meanwhile, pre-charge switch  $S_{PRE}$  is turned on by setting signal  $PRCH$  low to charge the read bit-line  $RBL[0]$  to supply voltage  $V_{DD}$ . Pre-charge switch  $S_{PRE}$  is then turned off by setting signal  $PRCH$  high, and the read word-line signal  $RWL[0]$  is set high to turn on the readout NMOS transistor switch  $N_3$  in the SRAM unit.

If  $w_0 = +1$ , the voltage of node  $DB$  (Extended Data Fig. 1b) in the SRAM unit would be ground voltage, and the NMOS transistor switch  $N_4$  in the SRAM unit would be turned-off. In this case, there is no discharging path between read bit-line  $RBL[0]$  and the ground, so the voltage of  $D_{OUT}$ , which is connected to  $RBL[0]$ , stays at the supply voltage  $V_{DD}$ .

If  $w_0 = -1$ , the voltage of node  $DB$  in the SRAM unit would be supply voltage  $V_{DD}$ , and the NMOS transistor switch  $N_4$  in the SRAM unit would be turned-on to discharge the read bit-line  $RBL[0]$ , as well as  $D_{OUT}$ , to the ground voltage. The voltage of  $D_{OUT}$  is buffered by two inverters to generate the final weight readout signals  $Q$  and  $QB$  to control the switches  $S_2$  and  $S_3$  in the pixel unit.

### Supplementary Note 2: Modelling of capacitance compensation in ACCEL

EAC chip implements MAC operations directly utilizing the light-induced photocurrent, which accumulates on the two computing-line  $V_+/V_-$  to cause a voltage drop from a pre-charged voltage that indicates the MAC results. The capacitance load of  $V_+$  and  $V_-$  line should be the same for the execution of standard MAC operation. However, the capacitance of the computing line  $V_+/V_-$  is dependent on the number of photodiodes connected to the line, which is determined by the number of positive/negative weights, and is also affected by the parasitic capacitance in the circuit. Therefore, we use one pair of positive/negative capacitance compensation module (P-CCM/N-CCM) demonstrated in Fig. 2f to tune the load capacitance of  $V_+$  and  $V_-$  to the same value. The P-CCM/N-CCM contains 64 compensation photodiodes ( $PD_C$ ) for capacitance tuning of  $V_+/V_-$ . The area of each of the  $PD_C$  is twice of the photodiode in the pixel, and the top of  $PD_C$  is covered with metal so that no light-induced photocurrent is generated. Hence,  $PD_C$  only serve as capacitor with capacitance value twice as the photodiode capacitance in the pixel. For the capacitance compensation, if  $V_+$  has less load capacitance than  $V_-$ , certain amount of  $PD_C$  is connected  $V_+$  to increase the load capacitance of  $V_+$  to the same value of  $V_-$ , and vice versa. Since the difference of the number of pixel photodiodes connected to  $V_+$  and  $V_-$  is an even number, the capacitance of  $PD_C$  is chosen as twice of the capacitance of the photodiode in the pixel. For the compensation of one group of MAC operations, a 6-bit register is employed to store the binary code which indicates the number of  $PD_C$  that should be connected to the computing line. As the weight parameters of each group of MAC operations are different, 16 group 6-bit registers are adopted to support up to 16 output for the EAC chip. For each

output, the 6-bit binary code of the corresponding output is selected with a 1 of 16 multiplexer (MUX), and decoded to thermometer-code to control 64 switches, each controlling the connection of one  $PD_C$  to the computing line.

Extended Data Fig. 1d illustrates the timing diagram of the capacitance compensation process, where the numbers of positive and negative weights are 490 and 534, respectively. The compensation-enable ( $CE$ ) signal controls the connection between the computing lines  $V_+/V_-$  and the current source as shown in Fig. 2f. The process of the compensation is performed in multiple steps using a binary search strategy. Each step contains three operation phases: pre-charging, discharging, and comparing. First, the computing lines  $V_+$  and  $V_-$  are pre-charged to supply voltage  $V_{DD}$  by enabling signal  $RST$  in the pixel. Signal  $RST$  is sequentially disabled and signal  $CE$  is set high to connect the current source to the computing lines. In this way, each of the  $V_+$  line and  $V_-$  line is discharged by a current with the same value. After a pre-defined discharging time, the  $CE$  signal is set low and the voltage of  $V_+$  and  $V_-$  are compared. In the case shown in Extended Data Fig. 1d, the voltage-drop on  $V_+$  is greater than the voltage-drop on  $V_-$  in the first step, indicating load capacitance of  $V_+$  is smaller than  $V_-$ . Therefore, extra amount of capacitance should be connected to  $V_+$  to ensure the  $V_+$  and  $V_-$  lines have the same value of load capacitance. A binary search algorithm is then adopted to determine the number of  $PD_C$  needed to be connected to the computing line  $V_+$ . According to the voltage comparison result, 32  $PD_C$  are connected to  $V_+$  at the end of the first step. In the second step, voltage drop on  $V_+$  is smaller than voltage drop on  $V_-$ , indicating that the number of  $PD_C$  connected to  $V_+$  should be reduced, and so the number is reduced to be 16. The above procedure is repeated until the voltage drop on  $V_+$  and  $V_-$  line is the same at the end of the dis-charging operation. The capacitance compensation is performed during the system start-up, and once the capacitance compensation is finished, ACCEL is ready for computation.

### Supplementary Note 3: Experimentally measured nonlinear response in ACCEL

We use the photoelectric nonlinearity between OAC and EAC as the nonlinearity in ACCEL. As the photodiode in ACCEL converts the complex optical field into electric current, the input amplitude of the optical field is nonlinear to the output current  $I$ . The optical field is composed of both the electric field whose amplitude is  $E$  and the magnetic field whose amplitude is  $H$ . The electric field and the magnetic field convert to each other constantly. We use the energy of the electric field to represent the energy of the optical field as common practice<sup>1</sup>. Then the relationship of photoelectric current  $I$  and the amplitude of the electric field of the light wave  $E$  can be described as<sup>1,2</sup>:

$$I = \frac{1}{2} \epsilon c \eta \frac{e}{h\nu} A E^2,$$

where  $\epsilon$  is the dielectric constant;  $c$  is the speed of light;  $\eta$  is the responsivity of the photodiode depending on the characteristic of the photodiode;  $e$  is elementary charge;  $h$  is Planck's constant;  $\nu$  is the frequency of light;  $A$  is the area of the photosensitive surface.

The photocurrent does not increase infinitely along with the increase of light power<sup>3</sup>. When the photocurrent of the photodiode saturates, the saturated photocurrent  $I_{sat}$ , input light power  $P_{sat}$  and the amplitude of electric field  $E_{sat}$  satisfy:

$$P_{sat} = \frac{I_{sat} h \nu}{\eta e}, E_{sat} = \sqrt{\frac{2 I_{sat} h \nu}{\epsilon c \eta e A}}.$$

In our demonstration, the response of the photodiode in ACCEL does not involve the saturate situation because ACCEL focuses on ultra-fast and low-exposure computation in vision tasks. For example, for incoherent situations, the power of sunlight can hardly reach the saturate power  $P_{sat}$ .

We measured the response to both coherent light at 532 nm (situations of Fig. 4-5) and incoherent white light (situations of Extended Data Fig. 4g-h and Supplementary Video 1) across a large intensity range to cover the exposure situations in the manuscript. White light can hardly reach extra high power in vision tasks in daily life, so it has a relatively small amplitude range (Extended Data Fig. 2a). For coherent light, we further enlarged the amplitude range with the laser (Changchun New Industries Optoelectronics Tech. Co., Ltd., MGL-III-532-300mW) to explore the response in a larger scope (Extended Data Fig. 2b). Both situations accord well with the theoretical quadric response and experimentally demonstrates the effective nonlinear response in ACCEL during all-analog computing.

#### Supplementary Note 4: Experimental computing speed and energy efficiency of ACCEL with 1-layer digital computation

The computing speed is calculated with the formula:

$$\text{Computing speed} = \frac{N_{op}}{t_{frame}} = \frac{N_o + N_e}{t_r + t_p + t_a + t_{AD} + t_{TPU}},$$

where  $N_{op}$  is the number of multiplication and adding operations ACCEL implements in one frame;  $t_{frame}$  is the time for ACCEL to process one frame;  $N_o$  is the number of operations implemented by OAC;  $N_e$  is the number of operations implemented by EAC;  $t_r$  is the reset time;  $t_p$  is the response time;  $t_a$  is the accumulating time;  $t_{AD}$  is the analog-to-digital data conversion time between ACCEL output and TPU input, and  $t_{TPU}$  is the time for the digital computing with TPU.

The number of operations implemented by ACCEL for one frame can be calculated as:

$$N_{op}(\text{3-class MNIST classification}) = (2 \times 264^2 - 1) \times 1024 + (2 \times 1024 - 1) \times 16 + (2 \times 16 - 1) \times 3 = 1.43 \times 10^8.$$

$$N_{op}(\text{10-class MNIST classification}) = (2 \times 264^2 - 1) \times 1024 + (2 \times 1024 - 1) \times 16 + (2 \times 16 - 1) \times 10 = 1.43 \times 10^8.$$

$$N_{op}(\text{time-lapse task}) = (2 \times 448^2 - 1) \times 1024 + (2 \times 1024 - 1) \times 16 + (2 \times 48 - 1) \times 5/3 = 4.11 \times 10^8.$$

The systemic energy efficiency is therefore calculated as:

$$\text{Energy efficiency}_{sys} = \frac{N_{op}}{E_{sys}} = \frac{N_o + N_e}{E_o + E_{cp} + E_{SRAM} + E_{control} + E_{AD} + E_{TPU}},$$

where  $E_{sys}$  is the systemic energy consumption of ACCEL;  $E_o$  is the laser energy;  $E_{cp}$  is the energy of the photocurrent to compute;  $E_{SRAM}$  is the energy of the SRAM to store, read and switch the weights;  $E_{control}$  is the energy of control unit;  $E_{AD}$  is the energy consumption of the analog-to-digital data conversion, and  $E_{TPU}$  is the computing energy of the TPU.

We calculate the experimental performance of ACCEL for 3-class and 10-class image classification in Supplementary Table 5. The systemic computing speed of ACCEL for both 3-class and 10-class MNIST classification reaches  $3.69 \times 10^2$  TOPS. The systemic energy efficiency of ACCEL for 3-class and 10-class image MNIST achieves  $5.90 \times 10^3$  TOPS/W and  $5.88 \times 10^3$  TOPS/W, respectively. The systemic computing speed of ACCEL for time-lapse tasks reaches  $1.05 \times 10^3$  TOPS and the systemic energy efficiency achieves  $4.22 \times 10^3$  TOPS/W.

### Supplementary Note 5: Comparison between the comparator and ADC

ACCEL adopts the comparator shown in Extended Data Fig. 1e as an analog-to-digital interface instead of conventional ADC for time-lapse task. The comparator is composed of two back-to-back inverters that form a latch, and several switches for timing controlling. The timing diagram of the comparator is illustrated in Extended Data Fig. 1f. The comparator operates in three phases. First, the *RESET* signal is set high to clear the residual charges at sampling node  $S_+$  and  $S_-$ . Then, the *RESET* signal is set low and the *SMP* signal is set high to sample the input voltages  $V_+$  and  $V_-$  at the sampling node  $S_+$  and  $S_-$  respectively. Finally, the *SMP* signal is set low and the *CMP\_EN* signal is set high to compare the sampled voltages at  $S_+$  and  $S_-$ . The voltage of the node with lower voltage is pulled down to ground voltage, and the voltage of the node with higher voltage is pulled up to supply voltage, which indicates the comparison result.

Since the comparator converts the input to a single-bit output, the conversion time and energy consumption of data conversion by comparator is much smaller than ADC, which samples the analog input signal and quantizes the input to multi-bit resolution digital data. For imaging application, the resolution of ADC is generally around 10-bit, and Supplementary Table 2 listed the performance of the comparator utilized in ACCEL and a state-of-the-art high-speed 10-bit ADC that is fabricated with 180 nm CMOS technology, the same as EAC. The conversion time and energy consumption of the comparator is respectively 3.81% and 1.21% of the ADC. Besides, ACCEL reduces the dimensionality of the input before the analog-to-digital interface from  $224 \times 224$  (original image) to 16 (extracted analog features), so ACCEL reduces the latency and energy consumption of the analog-to-digital interface by  $8.2 \times 10^4$  and  $2.6 \times 10^5$  times.

### Supplementary Note 6: Weight-switching time of SRAM

The weight-readout operation of SRAM is performed in two phases: pre-charge phase and readout phase (see Supplementary Note 1 for detailed principles of SRAM operation). To readout the data from SRAM, the control signal is first set low to reset the SRAM output node  $Q$  to 1, i.e., 1.8 V. Then the control signal is set high, and the on-chip controller generates the read word-line signal *RWL* to enable the readout process. If the data to be readout is 1, the output of SRAM stays at 1.8 V, and otherwise the output of SRAM is discharged to 0 V.

As the weight is binary, i.e., either -1 or 1 (corresponding to either  $V_-$  or  $V_+$  lines in EAC), there are altogether four situations of the weight switching: from -1 to 1, from -1 to -1, from 1 to -1 and from 1 to 1. The experimentally measured weight switching time of the off-chip output signal is shown in Extended Data Fig. 7a-d. Since the process for weight changing by SRAM comprises two steps: 1) resetting the weight to 1; 2) changing to the new weight, the situation from 1 to 1 requires 0 ns. The measured weight signal indeed remained 1, i.e. the supply voltage 1.8 V (Extended Data Fig. 7a). Since SRAM output is a control signal that determines the switch in the pixel unit (Fig. 2h) to be turned on or off, the signal slightly below half supply voltage, i.e. 0.9 V, already means the switch is turned-off and does not necessarily have to be 0 V. Similarly, the signal slightly above half supply voltage, i.e. 0.9 V, already means the switch is turned-on, and does not necessarily have to be 1.8 V. Here we use 1.5 V and 0.3 V as the criteria instead of just 0.9 V to give an extra-secure upper-bound measurement. The off-chip output signal experimentally took 12.73 ns to switch from -1 to 1 (Extended Data Fig. 7b) and 13.54 ns to switch from 1 to -1 (Extended Data Fig. 7c). For the fourth situation: from -1 to -1, the internal signal changes from 0 V to 1.8 V as reset and then to 0 V. Because of the significant delay in the off-chip output signal, the output signal starts to drop

before it could actually reach 1.8 V (Extended Data Fig. 7d, the orange line). The measured latency for it to finish the -1 to 1 to -1 process is 12.97 ns. As this one is a complicated situation, we also labeled the latency for the signal to actually reach 0 V, which is 13.27 ns (Extended Data Fig. 7d, the green dashed vertical line).

As a result, we have measured all four situations of the weight switching by SRAM, and the time are 0 ns, 12.73 ns, 13.54 ns and 12.97 ns. Even the delayed off-chip output signal completes the weight switching within 14 ns, indicating the actual complete time inside the chip is within 14 ns. We also calculated the theoretical output signal with parameters provided by the foundry Semiconductor Manufacturing International Corporation (SMIC). The trends and calculation results correspond quite well with the measured results (Extended Data Fig. 7e-h) and also are all below 14 ns. We used 500 MHz as the clock frequency for ACCEL and assign 7 clock periods for reset time. Therefore, the reset operation of the computing-line and weight-switching of SRAM can be conducted simultaneously within the reset time of 14 ns.

### **Supplementary Note 7: Design and simulation platform for EAC**

The design and pre-fabrication verification of the EAC chip is conducted with the Cadence design environment, via the 180 nm process design kit that includes the device model provided by Semiconductor Manufacturing International Corporation (SMIC), where the designed EAC chip is fabricated. We conduct post-simulation with the extracted post-end circuit netlist files from the chip layout to evaluate the speed performance of EAC. The required specification files for the extraction of post-end circuit netlist, including design rule checking (DRC), layout versus schematic (LVS) and parasitic electrical characteristic extraction (PEX), are also provided by SMIC.

### **Supplementary Note 8: Calculations of the noise variance in ACCEL outputs**

Since the output voltage of ACCEL is inevitably affected by noise in the circuit, the voltage drop should be large enough to guarantee a detectable signal-to-noise ratio (SNR). The noise at the chip output mainly stems from  $\sqrt{kT/C}$  noise, where  $k$  is the Boltzmann constant,  $T$  is thermodynamic temperature, and  $C$  is the load capacitance of the output signal line. The post-simulation with Cadence shows  $C$  is around 100 pF, indicating a noise level of 6.43  $\mu\text{V}_{\text{rms}}$ . We select the time point where the voltage drop of EAC output voltage is 65  $\mu\text{V}$ , thus providing a SNR of about 20 dB, to be the time point where the result is distinguishable enough, as presented in Fig. 6c.

### **Supplementary Note 9: Experimental computing speed and energy efficiency of ACCEL**

The computing speed is calculated with the formula:

$$\text{Computing speed} = \frac{N_{op}}{t_{frame}} = \frac{N_o + N_e}{t_r + t_p + t_a},$$

where  $N_{op}$  is the number of multiplication and adding operations ACCEL implements in one frame;  $t_{frame}$  is the time for ACCEL to process one frame;  $N_o$  is the number of operations implemented by OAC;  $N_e$  is the number of operations implemented by EAC;  $t_r$  is the reset time;  $t_p$  is the response time and  $t_a$  is the accumulating time.

Although we used ACCEL with two-layer  $400 \times 400$  OAC for 3-class ImageNet classification, the two OAC layers are two linearly connected matrix multiplication, without nonlinearity between. Therefore, we calculate the operation number in OAC as a matrix multiplication of a single  $400 \times 400$  OAC layer as the minimum operation number. Then the minimum number of operations



implemented by ACCEL for one frame can be calculated as:

$$N_{op}(\text{3-class ImageNet classification}) = (2 \times 400^2 - 1) \times 1024 + (2 \times 1024 - 1) \times 3 = 3.28 \times 10^8.$$

$$N_{op}(\text{10-class MNIST classification}) = (2 \times 264^2 - 1) \times 1024 + (2 \times 1024 - 1) \times 10 = 1.43 \times 10^8$$

The systemic energy efficiency is therefore calculated as:

$$\text{Energy efficiency}_{\text{sys}} = \frac{N_{op}}{E_{\text{sys}}} = \frac{N_o + N_e}{E_o + E_{cp} + E_{SRAM} + E_{control}},$$

where  $E_{\text{sys}}$  is the systemic energy consumption of ACCEL;  $E_o$  is the laser energy;  $E_{cp}$  is the energy of the photocurrent to compute;  $E_{SRAM}$  is the energy of the SRAM to store, read and switch the weights and  $E_{control}$  is the energy of control unit.

We calculate the experimental performance of ACCEL for 3-class and 10-class image classification in Supplementary Table 4. The systemic computing speed of ACCEL (10-class MNIST) reaches  $5.95 \times 10^2$  TOPS and the systemic energy efficiency achieves  $9.49 \times 10^3$  TOPS/W. The systemic computing speed of ACCEL (3-class ImageNet) reaches  $4.55 \times 10^3$  TOPS and the systemic energy efficiency achieves  $7.48 \times 10^4$  TOPS/W.

| <b>Fig. 2b-c: Image reconstruction with OAC output (MNIST)</b>         |                                                             |                                                                                      |                                                |                                                            |                                                                          |
|------------------------------------------------------------------------|-------------------------------------------------------------|--------------------------------------------------------------------------------------|------------------------------------------------|------------------------------------------------------------|--------------------------------------------------------------------------|
| <b>Digital neural network</b>                                          |                                                             |                                                                                      | <b>ACCEL</b>                                   |                                                            |                                                                          |
| <b>Network structure</b>                                               | <b>Neuron number in each layer</b>                          | <b>Nonlinearity</b>                                                                  | <b>Network Structure</b>                       | <b>Neuron number in each layer</b>                         | <b>Nonlinearity</b>                                                      |
| 3-layer fully-connected digital NN                                     | $16 \times 500$ ,<br>$500 \times 500$ ,<br>$500 \times 784$ | ReLU (between the first and second layer), tanh (between the second and third layer) | Not applied.                                   |                                                            |                                                                          |
| <b>Fig. 2d: Classification with features compressed by OAC (MNIST)</b> |                                                             |                                                                                      |                                                |                                                            |                                                                          |
| <b>Digital neural network</b>                                          |                                                             |                                                                                      | <b>ACCEL</b>                                   |                                                            |                                                                          |
| 3-layer fully-connected digital NN                                     | $784 \times 64$ ,<br>$64 \times 64$ ,<br>$64 \times 10$     | ReLU (between each two layers)                                                       | Not applied.                                   |                                                            |                                                                          |
| <b>Fig. 3b: Image classification (MNIST)</b>                           |                                                             |                                                                                      |                                                |                                                            |                                                                          |
| <b>Digital neural network</b>                                          |                                                             |                                                                                      | <b>ACCEL</b>                                   |                                                            |                                                                          |
| 3-layer fully-connected digital NN                                     | $784 \times 1024$ ,<br>$1024 \times 16$ ,<br>$16 \times 10$ | ReLU (between each two layers)                                                       | 1-layer OAC                                    | $500 \times 500$                                           | /                                                                        |
|                                                                        |                                                             |                                                                                      | 1-layer EAC                                    | $1024 \times 10$                                           | /                                                                        |
|                                                                        |                                                             |                                                                                      | 1-layer OAC + 1-layer EAC                      | $500 \times 500$ ,<br>$1024 \times 10$                     | PD nonlinearity between OAC and EAC                                      |
|                                                                        |                                                             |                                                                                      | 1-layer OAC + 1-layer EAC + 1-layer digital NN | $500 \times 500$ ,<br>$1024 \times 16$ ,<br>$16 \times 10$ | PD nonlinearity (between OAC and EAC), ReLU (between EAC and digital NN) |
| <b>Fig. 3c: Image classification (Fashion-MNIST)</b>                   |                                                             |                                                                                      |                                                |                                                            |                                                                          |
| <b>Digital neural network</b>                                          |                                                             |                                                                                      | <b>ACCEL</b>                                   |                                                            |                                                                          |
| 3-layer fully-connected NN                                             | $784 \times 1024$ ,<br>$1024 \times 16$ ,<br>$16 \times 10$ | ReLU (between each two layers)                                                       | 1-layer OAC + 1-layer EAC                      | $500 \times 500$ ,<br>$1024 \times 10$                     | PD nonlinearity between OAC and EAC                                      |
|                                                                        |                                                             |                                                                                      | 1-layer OAC + 1-layer EAC + 1-layer digital NN | $500 \times 500$ ,<br>$1024 \times 16$ ,<br>$16 \times 10$ | PD nonlinearity (between OAC and EAC), ReLU (between EAC and digital NN) |
| <b>Fig. 3d: Image classification (3-class ImageNet)</b>                |                                                             |                                                                                      |                                                |                                                            |                                                                          |

| Digital neural network                                                          |                                                                                                                                                                                       |                                | ACCEL                     |                                                                                 |                                     |
|---------------------------------------------------------------------------------|---------------------------------------------------------------------------------------------------------------------------------------------------------------------------------------|--------------------------------|---------------------------|---------------------------------------------------------------------------------|-------------------------------------|
| 3-layer fully-connected digital NN                                              | $65536 \times 1024, 1024 \times 16, 16 \times 3$                                                                                                                                      | ReLU (between each two layers) | 1-layer OAC + 1-layer EAC | $400 \times 400, 1024 \times 3$                                                 | PD nonlinearity between OAC and EAC |
| LeNet-5 (two convolutional layers with pooling, connected with three FC layers) | $5 \times 5 \times 1 \times 6$ convolutional kernels, max-pooling, $5 \times 5 \times 6 \times 16$ convolutional kernels, max-pooling, $59536 \times 120, 120 \times 84, 84 \times 3$ | ReLU (between each two layers) | 6-layer OAC + 1-layer EAC | $400 \times 400, 400 \times 400, 400 \times 400, 400 \times 400, 1024 \times 3$ | PD nonlinearity between OAC and EAC |

**Fig. 4f: Image classification (3-class ImageNet)**

| Digital neural network                                                          |                                                                                                                                                                                       |                                | ACCEL                     |                                                 |                                     |
|---------------------------------------------------------------------------------|---------------------------------------------------------------------------------------------------------------------------------------------------------------------------------------|--------------------------------|---------------------------|-------------------------------------------------|-------------------------------------|
| 3-layer fully-connected digital NN                                              | $65536 \times 1024, 1024 \times 16, 16 \times 3$                                                                                                                                      | ReLU (between each two layers) | 1-layer OAC + 1-layer EAC | $400 \times 400, 1024 \times 3$                 | PD nonlinearity between OAC and EAC |
| LeNet-5 (two convolutional layers with pooling, connected with three FC layers) | $5 \times 5 \times 1 \times 6$ convolutional kernels, max-pooling, $5 \times 5 \times 6 \times 16$ convolutional kernels, max-pooling, $59536 \times 120, 120 \times 84, 84 \times 3$ | ReLU (between each two layers) | 2-layer OAC + 1-layer EAC | $400 \times 400, 400 \times 400, 1024 \times 3$ | PD nonlinearity between OAC and EAC |

**Fig. 5b: Video judgment**

| Digital neural network |  | ACCEL                                          |                                               |                                                                                   |
|------------------------|--|------------------------------------------------|-----------------------------------------------|-----------------------------------------------------------------------------------|
| Not applied.           |  | 1-layer OAC + 1-layer EAC + 1-layer digital NN | $448 \times 448, 1024 \times 16, 48 \times 5$ | PD nonlinearity (between OAC and EAC), sign function (between EAC and digital NN) |

**Fig. 6d-e: Image classification (3-class ImageNet)**

| Digital neural network                                                  |  | ACCEL       |                 |   |
|-------------------------------------------------------------------------|--|-------------|-----------------|---|
| Because it is too long for here, we listed it in Supplementary Table 7. |  | 1-layer EAC | $1024 \times 3$ | / |

|                                                                            |                                                            |                                   |                                                              |                                                                                                                           |                                                                                               |
|----------------------------------------------------------------------------|------------------------------------------------------------|-----------------------------------|--------------------------------------------------------------|---------------------------------------------------------------------------------------------------------------------------|-----------------------------------------------------------------------------------------------|
|                                                                            |                                                            |                                   | 1-layer<br>OAC + 1-<br>layer EAC                             | $400 \times 400,$<br>$1024 \times 3$                                                                                      | PD nonlinearity<br>between OAC and<br>EAC                                                     |
|                                                                            |                                                            |                                   | 2-layer<br>OAC + 1-<br>layer EAC                             | $400 \times 400,$<br>$400 \times 400,$<br>$1024 \times 3$                                                                 | PD nonlinearity<br>between OAC and<br>EAC                                                     |
| <b>Extended Data Fig. 5c: Image classification (MNIST) under low light</b> |                                                            |                                   |                                                              |                                                                                                                           |                                                                                               |
| <b>Digital neural network</b>                                              |                                                            |                                   | <b>ACCEL</b>                                                 |                                                                                                                           |                                                                                               |
| 2-layer fully-<br>connected<br>digital NN                                  | $784 \times 1024,$<br>$1024 \times 10$                     | ReLU (between<br>each two layers) | 1-layer<br>OAC + 1-<br>layer EAC                             | $500 \times 500,$<br>$1024 \times 10$                                                                                     | PD nonlinearity<br>between OAC and<br>EAC                                                     |
| <b>Extended Data Fig. 5d: Video judgment under low light</b>               |                                                            |                                   |                                                              |                                                                                                                           |                                                                                               |
| <b>Digital neural network</b>                                              |                                                            |                                   | <b>ACCEL</b>                                                 |                                                                                                                           |                                                                                               |
| 3-layer fully-<br>connected<br>digital NN                                  | $50176 \times$<br>$1024, 1024 \times$<br>$16, 48 \times 5$ | ReLU (between<br>each two layers) | 1-layer<br>OAC + 1-<br>layer EAC<br>+ 1- layer<br>digital NN | $540 \times 540,$<br>$1024 \times 16,$<br>$48 \times 5$                                                                   | PD nonlinearity<br>(between OAC and<br>EAC), sign function<br>(between EAC and<br>digital NN) |
| <b>Extended Data Fig. 9a: Image classification (10-class MNIST)</b>        |                                                            |                                   |                                                              |                                                                                                                           |                                                                                               |
| <b>Digital neural network</b>                                              |                                                            |                                   | <b>ACCEL</b>                                                 |                                                                                                                           |                                                                                               |
| Because it is too long for here, we listed it in<br>Supplementary Table 6. |                                                            |                                   | 1-layer<br>EAC                                               | $1024 \times 10$                                                                                                          | /                                                                                             |
|                                                                            |                                                            |                                   | 1-layer<br>OAC + 1-<br>layer EAC                             | $500 \times 500,$<br>$1024 \times 10$                                                                                     | PD nonlinearity<br>between OAC and<br>EAC                                                     |
|                                                                            |                                                            |                                   | 2-layer<br>OAC + 1-<br>layer EAC                             | $500 \times 500,$<br>$500 \times 500,$<br>$1024 \times 10$                                                                | PD nonlinearity<br>between OAC and<br>EAC                                                     |
|                                                                            |                                                            |                                   | 3-layer<br>OAC + 1-<br>layer EAC                             | $500 \times 500,$<br>$500 \times 500,$<br>$500 \times 500,$<br>$1024 \times 10$                                           | PD nonlinearity<br>between OAC and<br>EAC                                                     |
|                                                                            |                                                            |                                   | 4-layer<br>OAC + 1-<br>layer EAC                             | $500 \times 500,$<br>$500 \times 500,$<br>$500 \times 500,$<br>$500 \times 500,$<br>$1024 \times 10$                      | PD nonlinearity<br>between OAC and<br>EAC                                                     |
|                                                                            |                                                            |                                   | 5-layer<br>OAC + 1-<br>layer EAC                             | $500 \times 500,$<br>$500 \times 500,$<br>$500 \times 500,$<br>$500 \times 500,$<br>$500 \times 500,$<br>$1024 \times 10$ | PD nonlinearity<br>between OAC and<br>EAC                                                     |
|                                                                            |                                                            |                                   | 6-layer                                                      | $500 \times 500,$                                                                                                         | PD nonlinearity                                                                               |

|                                                                         |                           |                                                                                |                                     |
|-------------------------------------------------------------------------|---------------------------|--------------------------------------------------------------------------------|-------------------------------------|
|                                                                         | OAC + 1-layer EAC         | 500 × 500,<br>500 × 500,<br>500 × 500,<br>500 × 500,<br>1024 × 10              | between OAC and EAC                 |
| <b>Extended Data Fig. 9b: Image classification (3-class ImageNet)</b>   |                           |                                                                                |                                     |
| <b>Digital neural network</b>                                           | <b>ACCEL</b>              |                                                                                |                                     |
| Because it is too long for here, we listed it in Supplementary Table 7. | 1-layer EAC               | 1024 × 3                                                                       | /                                   |
|                                                                         | 1-layer OAC + 1-layer EAC | 400 × 400,<br>1024 × 3                                                         | PD nonlinearity between OAC and EAC |
|                                                                         | 2-layer OAC + 1-layer EAC | 400 × 400,<br>400 × 400,<br>1024 × 3                                           | PD nonlinearity between OAC and EAC |
|                                                                         | 3-layer OAC + 1-layer EAC | 400 × 400,<br>400 × 400,<br>400 × 400,<br>1024 × 3                             | PD nonlinearity between OAC and EAC |
|                                                                         | 4-layer OAC + 1-layer EAC | 400 × 400,<br>400 × 400,<br>400 × 400,<br>400 × 400,<br>1024 × 3               | PD nonlinearity between OAC and EAC |
|                                                                         | 5-layer OAC + 1-layer EAC | 400 × 400,<br>400 × 400,<br>400 × 400,<br>400 × 400,<br>400 × 400,<br>1024 × 3 | PD nonlinearity between OAC and EAC |
|                                                                         | 6-layer OAC + 1-layer EAC | 400 × 400,<br>400 × 400,<br>400 × 400,<br>400 × 400,<br>400 × 400,<br>1024 × 3 | PD nonlinearity between OAC and EAC |

**Supplementary Table 1 | Benchmark of digital neural networks to compare with ACCEL.** PD: photodiode. OAC: optical analog computing. EAC: electronic analog computing. FC: fully-connected.

|                          | Comparator | ADC (SOTA, for 10-bit) <sup>5</sup> |
|--------------------------|------------|-------------------------------------|
| Time of per conversion   | 475.7 ps   | 12.5 ns                             |
| Energy of per conversion | 393.5 fJ   | 32.63 pJ                            |

**Supplementary Table 2 | Comparisons between the adopted comparator and the state-of-the-art 10-bit high-speed ADC fabricated with 180-nm CMOS process.** The data of the comparator is derived by circuit post-simulation with Cadence virtuoso tool according to model files provided by SMIC (Semiconductor Manufacturing International Corporation), where the EAC chip is fabricated with 180-nm standard CMOS process. The values of ADC are the latency and energy for 10-bit data. SOTA: state-of-the-art.

| Input light power ( $\mu\text{W}$ ) | Time for ACCEL output to reach 20-dB SNR (ns) |
|-------------------------------------|-----------------------------------------------|
| 350                                 | 2.1                                           |
| 250                                 | 3.0                                           |
| 200                                 | 3.7                                           |
| 150                                 | 5.0                                           |
| 100                                 | 7.6                                           |
| 80                                  | 9.2                                           |
| 60                                  | 13.7                                          |
| 30                                  | 23.2                                          |
| 10                                  | 73.9                                          |

**Supplementary Table 3 | Experimentally measured latency for the output voltage of ACCEL to reach 20-dB signal-to-noise ratio (SNR) under different input light power.** The noise level of ACCEL output is  $6.43 \mu\text{V}_{\text{rms}}$ , so ACCEL output has a SNR of 20 dB when the output voltage drops  $65 \mu\text{V}$ . Since the photocurrent that causes the voltage drop is proportional to the input light power, the time it takes for ACCEL output voltage to drop by  $65 \mu\text{V}$  is approximately inversely proportional to the input light power.

| Symbol                                 | Parameter                                   | 3-class<br>ImageNet<br>classification<br>(ACCEL) | 3-class<br>ImageNet<br>classification<br>(EAC only) | 10-class<br>MNIST<br>classification<br>(ACCEL) |
|----------------------------------------|---------------------------------------------|--------------------------------------------------|-----------------------------------------------------|------------------------------------------------|
| Neuron number to<br>compute each frame | OAC                                         | $400 \times 400$                                 | /                                                   | $264 \times 264$                               |
|                                        | EAC                                         | $1024 \times 3$                                  | $1024 \times 3$                                     | $1024 \times 10$                               |
| $N_{op}$                               | Operations per<br>frame                     | $3.28 \times 10^8$                               | $6.14 \times 10^3$                                  | $1.43 \times 10^8$                             |
| $t_r$                                  | Reset time                                  | $14 \times 3$ ns                                 | $14 \times 3$ ns                                    | $14 \times 10$ ns                              |
| $t_p + t_a$                            | Response time and<br>accumulating time      | $10 \times 3$ ns                                 | $10 \times 3$ ns                                    | $10 \times 10$ ns                              |
| $E_{cp}$                               | Energy of the<br>photocurrent to<br>compute | 0.01 nJ                                          | 0.01 nJ                                             | 0.04 nJ                                        |
| $E_o$                                  | Energy of the laser                         | 3.40 nJ                                          | 3.40 nJ                                             | 11.77 nJ                                       |
| $E_{SRAM}$                             | Energy of the<br>SRAM to store              | 0.37 nJ                                          | 0.37 nJ                                             | 1.22 nJ                                        |
| $E_{control}$                          | Energy of control<br>unit                   | 0.60 nJ                                          | 0.60 nJ                                             | 2.01 nJ                                        |
| /                                      | Systemic<br>computing speed                 | $4.55 \times 10^3$<br>TOPS                       | 0.09<br>TOPS                                        | $5.95 \times 10^2$<br>TOPS                     |
| Energy efficiency <sub>sys</sub>       | Systemic energy<br>efficiency               | $7.48 \times 10^4$<br>TOPS/W                     | 1.40<br>TOPS/W                                      | $9.49 \times 10^3$<br>TOPS/W                   |

**Supplementary Table 4 | Experimental computing performance of ACCEL in the all-analog mode.** The clock frequency in our ACCEL prototype is 500 MHz. The supply voltage of the computing module in EAC and SRAM is 1.8 V; the supply voltage of the control unit is 1.0 V; the measured average current of the computing module, control unit and SRAM are 89.15  $\mu$ A, 8.38 mA and 2.83 mA respectively. Although we used ACCEL with two-layer  $400 \times 400$  OAC for 3-class ImageNet classification, the two OAC layers are two linearly connected matrix multiplication, without nonlinearity between. Therefore, we calculate the operation number in OAC as a matrix multiplication of a single  $400 \times 400$  OAC layer as the minimum operation number. We use the measured laser energy instead of the energy arriving at ACCEL as the energy of light.



| Symbol                                 | Parameter                                   | 3-class<br>MNIST<br>classification<br>(ACCEL) | 10-class<br>MNIST<br>classification<br>(ACCEL) | Time-lapse<br>task           |
|----------------------------------------|---------------------------------------------|-----------------------------------------------|------------------------------------------------|------------------------------|
| Neuron number to<br>compute each frame | First layer (OAC)                           | $264 \times 264$                              | $264 \times 264$                               | $448 \times 448$             |
|                                        | Second layer (EAC)                          | $1024 \times 16$                              | $1024 \times 16$                               | $1024 \times 16$             |
|                                        | Third layer (TPU)                           | $16 \times 3$                                 | $16 \times 10$                                 | $48 \times 5/3$              |
| $N_{op}$                               | Operations per<br>frame                     | $1.43 \times 10^8$                            | $1.43 \times 10^8$                             | $4.11 \times 10^8$           |
| $t_r$                                  | Reset time                                  | $14 \times 16$ ns                             | $14 \times 16$ ns                              | $14 \times 16$ ns            |
| $t_p + t_a$                            | Response time and<br>accumulating time      | $10 \times 16$ ns                             | $10 \times 16$ ns                              | $10 \times 16$ ns            |
| $t_{AD}$                               | Analog-to-digital<br>conversion time        | $0.20 \times 16$ ns*                          | $0.20 \times 16$ ns*                           | $0.48 \times 16$ ns†         |
| $t_{TPU}$                              | Digital computing<br>time                   | 1.01 ps                                       | 3.37 ps                                        | 1.72 ps                      |
| $E_{cp}$                               | Energy of the<br>photocurrent to<br>compute | 0.06 nJ                                       | 0.06 nJ                                        | 0.06 nJ                      |
| $E_o$                                  | Energy of the laser                         | 18.83 nJ                                      | 18.83 nJ                                       | 92.03 nJ                     |
| $E_{SRAM}$                             | Energy of the<br>SRAM to store              | 1.96 nJ                                       | 1.96 nJ                                        | 1.96 nJ                      |
| $E_{control}$                          | Energy of control<br>unit                   | 3.22 nJ                                       | 3.22 nJ                                        | 3.22 nJ                      |
| $E_{AD}$                               | Energy of analog-to-<br>digital conversion  | 92.80 pJ*                                     | 92.80 pJ*                                      | 6.30 pJ†                     |
| $E_{TPU}$                              | Energy of TPU                               | 0.04 nJ                                       | 0.13 nJ                                        | 0.07 nJ                      |
| /                                      | Systemic<br>computing speed                 | $3.69 \times 10^2$<br>TOPS                    | $3.69 \times 10^2$<br>TOPS                     | $1.05 \times 10^3$<br>TOPS   |
| Energy efficiency <sub>sys</sub>       | Systemic energy<br>efficiency               | $5.90 \times 10^3$<br>TOPS/W                  | $5.88 \times 10^3$<br>TOPS/W                   | $4.22 \times 10^3$<br>TOPS/W |

**Supplementary Table 5 | Experimental computing performance of ACCEL connected with one digital layer.** \*State-of-the-art high-speed 10-bit ADC<sup>6</sup>. †On-chip comparator in EAC chip. The clock frequency in our ACCEL prototype is 500 MHz. The supply voltage of the computing module in EAC and SRAM is 1.8 V; the supply voltage of the control unit is 1.0 V; the measured average current of the computing module, control unit and SRAM are 89.15  $\mu$ A, 8.38 mA and 2.83 mA, respectively. We use the measured laser energy instead of the energy arriving at ACCEL as the energy of light.

| MNIST (different layer numbers): Extended Data Fig. 9a |                                                                                                  |                                  |                                  |                                  |                                  |                                  |
|--------------------------------------------------------|--------------------------------------------------------------------------------------------------|----------------------------------|----------------------------------|----------------------------------|----------------------------------|----------------------------------|
| LeNet                                                  | Kernel size and neuron number in each layer<br>(height × width × input channel × output channel) |                                  |                                  |                                  |                                  |                                  |
| <b>1st Conv</b>                                        | $5 \times 5 \times 1 \times 10$                                                                  | $5 \times 5 \times 1 \times 10$  | $5 \times 5 \times 1 \times 10$  | $5 \times 5 \times 1 \times 10$  | $5 \times 5 \times 1 \times 10$  | $5 \times 5 \times 1 \times 10$  |
| <b>2nd Conv</b>                                        | /                                                                                                | $5 \times 5 \times 10 \times 11$ | $5 \times 5 \times 10 \times 11$ | $5 \times 5 \times 10 \times 11$ | $5 \times 5 \times 10 \times 11$ | $5 \times 5 \times 10 \times 11$ |
| <b>3rd Conv</b>                                        | /                                                                                                | /                                | $5 \times 5 \times 11 \times 12$ | $5 \times 5 \times 11 \times 12$ | $5 \times 5 \times 11 \times 12$ | $5 \times 5 \times 11 \times 12$ |
| <b>4th Conv</b>                                        | /                                                                                                | /                                | /                                | $5 \times 5 \times 12 \times 15$ | $5 \times 5 \times 12 \times 15$ | $5 \times 5 \times 12 \times 15$ |
| <b>5th Conv</b>                                        | /                                                                                                | /                                | /                                | /                                | $5 \times 5 \times 15 \times 18$ | $5 \times 5 \times 15 \times 18$ |
| <b>6th Conv</b>                                        | /                                                                                                | /                                | /                                | /                                | /                                | $5 \times 5 \times 18 \times 21$ |
| <b>1st FC</b>                                          | $7290 \times 120$                                                                                | $7436 \times 120$                | $7500 \times 120$                | $8640 \times 120$                | $9522 \times 120$                | $10164 \times 120$               |
| <b>2nd FC</b>                                          | $120 \times 84$                                                                                  | $120 \times 84$                  | $120 \times 84$                  | $120 \times 84$                  | $120 \times 84$                  | $120 \times 84$                  |
| <b>3rd FC</b>                                          | $84 \times 10$                                                                                   | $84 \times 10$                   | $84 \times 10$                   | $84 \times 10$                   | $84 \times 10$                   | $84 \times 10$                   |
| <b>Accuracy</b>                                        | 98.8%                                                                                            | 99.1%                            | 99.2%                            | 99.3%                            | 99.3%                            | 99.3%                            |
| <b>Fully-connected</b>                                 | Neuron number in each layer (input neurons × output neurons)                                     |                                  |                                  |                                  |                                  |                                  |
| <b>1st FC</b>                                          | $784 \times 7500$                                                                                | $784 \times 7500$                | $784 \times 7500$                | $784 \times 7500$                | $784 \times 7500$                | $784 \times 7500$                |
| <b>2nd FC</b>                                          | $7500 \times 10$                                                                                 | $7500 \times 700$                | $7500 \times 1400$               | $7500 \times 1900$               | $7500 \times 2100$               | $7500 \times 2300$               |
| <b>3rd FC</b>                                          | /                                                                                                | $700 \times 10$                  | $1400 \times 700$                | $1900 \times 1400$               | $2100 \times 1900$               | $2300 \times 2100$               |
| <b>4th FC</b>                                          | /                                                                                                | /                                | $700 \times 10$                  | $1400 \times 700$                | $1900 \times 1400$               | $2100 \times 1900$               |
| <b>5th FC</b>                                          | /                                                                                                | /                                | /                                | $700 \times 10$                  | $1400 \times 700$                | $1900 \times 1400$               |
| <b>6th FC</b>                                          | /                                                                                                | /                                | /                                | /                                | $700 \times 10$                  | $1400 \times 700$                |
| <b>7th FC</b>                                          | /                                                                                                | /                                | /                                | /                                | /                                | $700 \times 10$                  |
| <b>Accuracy</b>                                        | 98.5%                                                                                            | 98.6%                            | 98.6%                            | 98.6%                            | 98.6%                            | 98.6%                            |

**Supplementary Table 6 | Structures of digital neural networks with different layer numbers for comparison with ACCEL on 10-class MNIST classification.** The size of the input image is  $28 \times 28$ . Each layer of the network is connected to a nonlinear ReLU layer, and the convolutional layer is connected to a pooling layer which has the pooling size of 2 and stride of 1 before ReLU. Each convolutional layer has padding of two pixels on each side. FC: fully-connected layer. Conv: convolutional layer.

| 3-class ImageNet (different layer numbers): Extended Data Fig. 9b, Fig. 6d-e |                                                                                                                       |                                |                                 |                                  |                                  |                                  |
|------------------------------------------------------------------------------|-----------------------------------------------------------------------------------------------------------------------|--------------------------------|---------------------------------|----------------------------------|----------------------------------|----------------------------------|
| LeNet                                                                        | Kernel size and neuron number in each layer<br>(height $\times$ width $\times$ input channel $\times$ output channel) |                                |                                 |                                  |                                  |                                  |
| <b>1st Conv</b>                                                              | $5 \times 5 \times 1 \times 2$                                                                                        | $5 \times 5 \times 1 \times 3$ | $5 \times 5 \times 1 \times 3$  | $5 \times 5 \times 1 \times 3$   | $5 \times 5 \times 1 \times 3$   | $5 \times 5 \times 1 \times 3$   |
| <b>2nd Conv</b>                                                              | /                                                                                                                     | $5 \times 5 \times 3 \times 5$ | $5 \times 5 \times 3 \times 5$  | $5 \times 5 \times 3 \times 5$   | $5 \times 5 \times 3 \times 5$   | $5 \times 5 \times 3 \times 5$   |
| <b>3rd Conv</b>                                                              | /                                                                                                                     | /                              | $5 \times 5 \times 5 \times 10$ | $5 \times 5 \times 5 \times 10$  | $5 \times 5 \times 5 \times 10$  | $5 \times 5 \times 5 \times 10$  |
| <b>4th Conv</b>                                                              | /                                                                                                                     | /                              | /                               | $5 \times 5 \times 10 \times 16$ | $5 \times 5 \times 10 \times 16$ | $5 \times 5 \times 10 \times 15$ |
| <b>5th Conv</b>                                                              | /                                                                                                                     | /                              | /                               | /                                | $5 \times 5 \times 16 \times 20$ | $5 \times 5 \times 15 \times 18$ |
| <b>6th Conv</b>                                                              | /                                                                                                                     | /                              | /                               | /                                | /                                | $5 \times 5 \times 18 \times 22$ |
| <b>1st FC</b>                                                                | $32768 \times 120$                                                                                                    | $20480 \times 120$             | $10240 \times 120$              | $15376 \times 120$               | $18000 \times 120$               | $18502 \times 120$               |
| <b>2nd FC</b>                                                                | $120 \times 84$                                                                                                       | $120 \times 84$                | $120 \times 84$                 | $120 \times 84$                  | $120 \times 84$                  | $120 \times 84$                  |
| <b>3rd FC</b>                                                                | $84 \times 3$                                                                                                         | $84 \times 3$                  | $84 \times 3$                   | $84 \times 3$                    | $84 \times 3$                    | $84 \times 3$                    |
| <b>Accuracy</b>                                                              | 79.3%                                                                                                                 | 84.0%                          | 84.7%                           | 87.3%                            | 90.7%                            | 90.7%                            |
| <b>Fully-connected</b>                                                       | Neuron number in each layer (input neurons $\times$ output neurons)                                                   |                                |                                 |                                  |                                  |                                  |
| <b>1st FC</b>                                                                | $65536 \times 90$                                                                                                     | $65536 \times 180$             | $65536 \times 270$              | $65536 \times 360$               | $65536 \times 450$               | $65536 \times 535$               |
| <b>2nd FC</b>                                                                | $90 \times 3$                                                                                                         | $180 \times 90$                | $270 \times 180$                | $360 \times 270$                 | $450 \times 360$                 | $535 \times 450$                 |
| <b>3rd FC</b>                                                                | /                                                                                                                     | $90 \times 3$                  | $180 \times 90$                 | $270 \times 180$                 | $360 \times 270$                 | $450 \times 360$                 |
| <b>4th FC</b>                                                                | /                                                                                                                     | /                              | $90 \times 3$                   | $180 \times 90$                  | $270 \times 180$                 | $360 \times 270$                 |
| <b>5th FC</b>                                                                | /                                                                                                                     | /                              | /                               | $90 \times 3$                    | $180 \times 90$                  | $270 \times 180$                 |
| <b>6th FC</b>                                                                | /                                                                                                                     | /                              | /                               | /                                | $90 \times 3$                    | $180 \times 90$                  |
| <b>7th FC</b>                                                                | /                                                                                                                     | /                              | /                               | /                                | /                                | $90 \times 3$                    |
| <b>Accuracy</b>                                                              | 72.0%                                                                                                                 | 76.7%                          | 76.7%                           | 78.0%                            | 78.0%                            | 78.0%                            |

**Supplementary Table 7 | Structures of digital neural networks with different layer numbers for comparisons with ACCEL for 3-class ImageNet classification.** The size of the input image is  $256 \times 256$ . Each layer of the network is connected to a nonlinear ReLU layer, and the convolutional layer is connected to a pooling layer which has the pooling size of 2 and stride of 2 (1 when exceeding 3rd conv layers) before ReLU. Each convolutional layer has padding of two pixels on each side. FC: fully-connected layer. Conv: convolutional layer. NN: neural network.

## References

1. Grant, I. S., & Phillips, W. R. *Electromagnetism*. (John Wiley & Sons, 2008)
2. Ohta, J. *Smart CMOS image sensors and applications*. (CRC Press, 2020).
3. Thorlabs Inc. Photodiode Saturation Limit and Noise Floor. [https://www.thorlabs.com/images/TabImages/Photodetector\\_Lab.pdf](https://www.thorlabs.com/images/TabImages/Photodetector_Lab.pdf) (2015).
4. OMNIVISION. OMNIVISION Commercializes World's Smallest Pixel in New 200MP Image Sensor with Superior Low-light Performance for High-end Smartphones. <https://www.ovt.com/press-releases/omnivision-commercializes-worlds-smallest-pixel-in-new-200mp-image-sensor-with-superior-low-light-performance-for-high-end-smartphones/> (2022).
5. Shen, Y., Zhu, Z., Liu, S. & Yang, Y. A Reconfigurable 10-to-12-b 80-to-20-MS/s bandwidth scalable SAR ADC. *IEEE Trans. Circuits Syst. I: Regular Papers* **65**, 51-60 (2018).
6. Guo, M., Mao, J., Sin, S. W., Wei, H. & Martins, R. P. A 29mW 5GS/s time-interleaved SAR ADC achieving 48.5dB SNDR with fully-digital timing-skew calibration based on digital-mixing. In *2019 Symposium on VLSI Circuits (VLSI)*, C76-C77 (IEEE, 2019)
